# Supplementary material for: Oldowan Technology Amid Shifting Environments ∼2.03–1.83 Million Years Ago
Source: Frontiers journal article supplement (doi:10.3389/fevo.2022.788101), 2022-03-03
Supplement: Table_1.DOCX [file Table_1.DOCX]

|  | Phase I | Phase II | Phase III | Phase IV | Phase V |
| --- | --- | --- | --- | --- | --- |
| *N* | 3 | 107 | 111 | 100 | 12 |
| Mean | 18 | 13.59 | 11.8 | 10.61 | 12.35 |
| Median | 17.2 | 12.4 | 10.8 | 9.5 | 12 |
| SD | 7.13 | 6.47 | 5.80 | 4.51 | 2.98 |
| CV | 39.63 | 47.64 | 49.16 | 42.54 | 24.17 |

**Supplementary Table S1**. Summary statistics for flake thickness. *n* = number, SD = Standard deviation, CV = Coefficient of Variation.
