# Supplementary material for: Oldowan Technology Amid Shifting Environments ∼2.03–1.83 Million Years Ago
Source: Frontiers journal article supplement (doi:10.3389/fevo.2022.788101), 2022-03-03
Supplement: Table_2.DOCX [file Table_2.DOCX]

|  | Phase I | Phase II | Phase III | Phase IV | Phase V |
| --- | --- | --- | --- | --- | --- |
| *N* | 3 | 107 | 111 | 100 | 12 |
| Mean | 13.66 | 10.38 | 9.13 | 8.4 | 8.66 |
| Median | 14 | 8 | 8 | 7 | 8 |
| SD | 1.52 | 5.84 | 4.9 | 4.09 | 3.91 |
| CV | 11.17 | 56.27 | 53.67 | 48.77 | 45.18 |

**Supplementary Table S2.** Summary statistics for platform thickness. *n* = number, SD = Standard deviation, CV = Coefficient of Variation.
