# Supplementary material for: Oldowan Technology Amid Shifting Environments ∼2.03–1.83 Million Years Ago
Source: Frontiers journal article supplement (doi:10.3389/fevo.2022.788101), 2022-03-03
Supplement: Table_3.DOCX [file Table_3.DOCX]

|  | Phase I | Phase II | Phase III | Phase IV | Phase V |
| --- | --- | --- | --- | --- | --- |
| Flake thickness | 0.8142 | 5.425 e-06 | 3.174 e-05 | 6.107 e-06 | 0.1087 |
| Platform thickness | 0.6369 | 1.147 e-10 | 1.676e-05 | 2.954 e-06 | 0.6417 |

**Supplementary Table S3.** P-value for Shapiro Wilk test for normality distribution.
