# Supplementary material for: Oldowan Technology Amid Shifting Environments ∼2.03–1.83 Million Years Ago
Source: Frontiers journal article supplement (doi:10.3389/fevo.2022.788101), 2022-03-03
Supplement: Table_4.DOCX [file Table_4.DOCX]

|  | *N* | Min. Num. Removals | Max. Num. Removals | Average  Num.  Removals | Average Length (mm) | Average Width (mm) | Average Thickness (mm) | SD Length (mm) | SD Width (mm) | SD Thickness (mm) |
| --- | --- | --- | --- | --- | --- | --- | --- | --- | --- | --- |
| Multipolar multifacial | 1 | 16 | 16 | 16 | 93.1 | 88.1 | 70.6 | N/A | N/A | N/A |
| Unipolar longitudinal | 2 | 3 | 3 | 3 | 78.6 | 67.1 | 47.5 | 15.8 | 15.9 | 13.8 |
| Bifacial orthogonal | 2 | 3 | 5 | 4 | 79.7 | 63.4 | 58.1 | 32.9 | 29.5 | 20.9 |
| Unifacial centripetal | 1 | 7 | 7 | 7 | 61.4 | 60.3 | 37.9 | N/A | N/A | N/A |
| Bipolar on anvil | - | - | - | - | - | - | - | - | - | - |
| Bifacial centripetal | - | - | - | - | - | - | - | - | - | - |
| Unifacial bipolar | - | - | - | - | - | - | - | - | - | - |

**Supplementary Table S4**. Phase I Minimum (Min. Num), Maximum (Max. Num) and Average number of removals per knapping method. Average core measurements and standard deviations (SD). N/A = not applicable, as the sample is n = 1.
