# Supplementary material for: Oldowan Technology Amid Shifting Environments ∼2.03–1.83 Million Years Ago
Source: Frontiers journal article supplement (doi:10.3389/fevo.2022.788101), 2022-03-03
Supplement: Table_5.DOCX [file Table_5.DOCX]

|  | *N* | Min. Num. Removals | Max. Num. Removals | Average  Num.  Removals | Average Length (mm). | Average Width (mm) | Average Thickness (mm) | SD Length (mm) | SD Width (mm) | SD Thickness (mm) |
| --- | --- | --- | --- | --- | --- | --- | --- | --- | --- | --- |
| Multipolar multifacial | 11 | 4 | 12 | 8.1 | 65.9 | 58.3 | 52 | 16.2 | 14.5 | 13.4 |
| Unipolar longitudinal | 8 | 2 | 8 | 4.8 | 86.3 | 66.4 | 52.2 | 35.3 | 20.1 | 17.9 |
| Bifacial orthogonal | 6 | 4 | 10 | 5.16 | 53.1 | 46.8 | 40.2 | 5 | 6.5 | 9.5 |
| Unifacial centripetal | 1 | 5 | 5 | 5 | 100.3 | 75.9 | 59.3 | N/A | N/A | N/A |
| Bipolar on anvil | 2 | 3 | 5 | 4 | 68.3 | 58.9 | 45.9 | 13.2 | 20.9 | 11.7 |
| Bifacial centripetal | - |  |  |  | - | - | - | - | - | - |
| Unifacial bipolar | - |  |  |  | - | - | - | - | - | - |

**Supplementary Table S5** Phase II Minimum (Min. Num), Maximum (Max. Num) and Average number of removals per knapping method. Average core measurements and standard deviations (SD). N/A = not applicable, as the sample is n = 1.
