# Supplementary material for: Oldowan Technology Amid Shifting Environments ∼2.03–1.83 Million Years Ago
Source: Frontiers journal article supplement (doi:10.3389/fevo.2022.788101), 2022-03-03
Supplement: Table_6.DOCX [file Table_6.DOCX]

|  | *N* | Min. Num. Removals | Max. Num. Removals | Average  Num.  Removals | Average Length (mm) | Average Width (mm) | Average Thickness (mm) | SD Length (mm) | SD Width (mm) | SD Thickness (mm) |
| --- | --- | --- | --- | --- | --- | --- | --- | --- | --- | --- |
| Multipolar multifacial | 6 | 8 | 12 | 11.2 | 58.4 | 51.7 | 45.3 | 18.3 | 16.3 | 14.3 |
| Unipolar longitudinal | 5 | 2 | 8 | 4.4 | 85.7 | 61 | 51.9 | 11.1 | 10.9 | 11.9 |
| Bifacial orthogonal | 4 | 2 | 8 | 4.8 | 65.6 | 50.3 | 45.7 | 16.7 | 14.1 | 9.7 |
| Unifacial centripetal | 2 | 5 | 7 | 6 | 74.7 | 52.8 | 36.7 | 13.5 | 0.1 | 10.8 |
| Bipolar on anvil | - | - | - | - | - | - | - | - | - | - |
| Bifacial centripetal | 2 | 4 | 10 | 7 | 53.7 | 46.7 | 29.7 | 4.7 | 2.1 | 8.3 |
| Unifacial bipolar | 1 | 8 | 8 | 8 | 97.2 | 64.1 | 63.9 | N/A | N/A | N/A |

**Supplementary Table S6**. Phase III Minimum (Min. Num), Maximum (Max. Num) and Average number of removals per knapping method. Average core measurements and standard deviations (SD). N/A = not applicable, as the sample is n = 1.
