# Supplementary material for: Oldowan Technology Amid Shifting Environments ∼2.03–1.83 Million Years Ago
Source: Frontiers journal article supplement (doi:10.3389/fevo.2022.788101), 2022-03-03
Supplement: Table_7.DOCX [file Table_7.DOCX]

|  | *N* | Min. Num. Removals | Max. Num. Removals | Average  Num.  Removals | Average Length (mm) | Average Width (mm) | Average Thickness (mm) | SD Length (mm) | SD Width (mm) | SD Thickness (mm) |
| --- | --- | --- | --- | --- | --- | --- | --- | --- | --- | --- |
| Multipolar multifacial | 1 | 4 | 4 | 4 | 47.8 | 39.5 | 32.6 | N/A | N/A | N/A |
| Unipolar longitudinal | 1 | 3 | 3 | 3 | 136.6 | 80 | 66.6 | N/A | N/A | N/A |
| Bifacial orthogonal | 1 | 5 | 5 | 5 | 39.3 | 33.6 | 20.4 | N/A | N/A | N/A |
| Unifacial centripetal | - |  |  |  | - | - | - | - | - | - |
| Bipolar on anvil | 1 | 2 | 2 | 2 | 72.8 | 72 | 35.4 | N/A | N/A | N/A |
| Bifacial centripetal | 1 | 8 | 8 | 8 | 66.8 | 66.4 | 30.4 | N/A | N/A | N/A |
| Unifacial bipolar | - |  |  |  | - | - | - | - | - | - |

**Supplementary Table S7**. Phase IV Minimum (Min. Num), Maximum (Max. Num) and Average number of removals per knapping method. Average core measurements and standard deviations (SD). N/A = not applicable, as the sample is n = 1.
