# Supplementary material for: Oldowan Technology Amid Shifting Environments ∼2.03–1.83 Million Years Ago
Source: Frontiers journal article supplement (doi:10.3389/fevo.2022.788101), 2022-03-03
Supplement: Table_8.DOCX [file Table_8.DOCX]

| Phase | I | II | III | IV |
| --- | --- | --- | --- | --- |
| *n* | 6 | 25 | 13 | 4 |
| Min (g) | 312.99 | 222.77 | 279.82 | 270.03 |
| Max (g) | 2658.83 | 2540.38 | 1978.34 | 1256.71 |
| Mean (g) | 1018.76 | 755.24 | 631.15 | 628.59 |
| Median (g) | 615.23 | 571.72 | 496.29 | 493.81 |
| SD | 917.33 | 617.31 | 446 | 444.51 |
| CV | 0.90 | 0.81 | 0.70 | 0.70 |
| Shapiro Wilk normality test (p) | 0.06 | 0.0002 | 0.0005 | 0.32 |

**Supplementary Table S8.** Summary statistics of Estimated Original Mass (EOM) of the cores according Phase. SD = Standard deviation, CV = Coefficient of Variation.
