# Supplementary material for: Oldowan Technology Amid Shifting Environments ∼2.03–1.83 Million Years Ago
Source: Frontiers journal article supplement (doi:10.3389/fevo.2022.788101), 2022-03-03
Supplement: Table_9.DOCX [file Table_9.DOCX]

| Phase | I | II | III | IV |
| --- | --- | --- | --- | --- |
| *n* | 6 | 25 | 13 | 4 |
| Min (%) | 50 | 24.13 | 23.22 | 39.45 |
| Max (%) | 76.48 | 83.97 | 81.16 | 76.44 |
| Mean (%) | 62.74 | 63.14 | 55.76 | 56.98 |
| Median (%) | 60.14 | 67.60 | 62.16 | 56.02 |
| SD | 11.53 | 14.35 | 17.89 | 19.49 |
| CV | 0.18 | 0.22 | 0.32 | 0.34 |
| Shapiro Wilk normality test (p) | 0.23 | 0.06 | 0.42 | 0.12 |

**Supplementary Table S9.** Summary statistics of Estimated Percentage of Extracted Mass (EPEM) of the cores according Phase. SD = Standard deviation, CV = Coefficient of Variation.
