# Supplementary material for: Oldowan Technology Amid Shifting Environments ∼2.03–1.83 Million Years Ago
Source: Frontiers journal article supplement (doi:10.3389/fevo.2022.788101), 2022-03-03
Supplement: Table_12.DOCX [file Table_12.DOCX]

|  | EOM I | EOM II | EOM III | EOM IV |
| --- | --- | --- | --- | --- |
| EOM I | - | 0.77 | 0.9 | 0.88 |
| EOM II |  | - | 0.41 | 0.99 |
| EOM III |  |  | - | 0.76 |
| EOM IV |  |  |  | - |

**Supplementary Table S12.** Kolmogorov-Smirnov tests (p) comparing the Estimated Original Mass (EOM) distribution between Phase.
