# Supplementary material for: Oldowan Technology Amid Shifting Environments ∼2.03–1.83 Million Years Ago
Source: Frontiers journal article supplement (doi:10.3389/fevo.2022.788101), 2022-03-03
Supplement: Table_13.DOCX [file Table_13.DOCX]

|  | EPEM I | EPEM II | EPEM III | EPEM IV |
| --- | --- | --- | --- | --- |
| EPEM I | - | 0.99 | 0.79 | 0.93 |
| EPEM II |  | - | 0.51 | 0.88 |
| EPEM III |  |  | - | 0.99 |
| EPEM IV |  |  |  | - |

**Supplementary Table S13.** Kolmogorov-Smirnov tests (p) comparing Estimated Percentage of Extracted Mass (EPEM) distribution between Phases.
