# Supplementary material for: Oldowan Technology Amid Shifting Environments ∼2.03–1.83 Million Years Ago
Source: Frontiers journal article supplement (doi:10.3389/fevo.2022.788101), 2022-03-03
Supplement: Table_14.DOCX [file Table_14.DOCX]

|  | Bif. Cent | Bif. Ort | B. Anvil | Multi. | Uni. Bip | Uni. Cent | Uni. Long |
| --- | --- | --- | --- | --- | --- | --- | --- |
| *n* | 2 | 10 | 2 | 18 | 1 | 2 | 13 |
| Min (g) | 296.70 | 222.78 | 259.74 | 226.74 | 868.64 | 581.04 | 247.57 |
| Max (g) | 622.93 | 1539.75 | 364.71 | 2658.84 | 868.64 | 1181.09 | 2540.38 |
| Mean (g) | 459.81 | 471.18 | 312.23 | 918.84 | 868.64 | 881.06 | 791.35 |
| Median (g) | 459.81 | 305.24 | 312.23 | 671.81 | 868.64 | 881.06 | 636.44 |
| SD | 230.67 | 407.30 | 74.22 | 729.29 | NA | 424.30 | 600.24 |
| CV | 0.5 | 0.86 | 0.23 | 0.79 | NA | 0.48 | 0.75 |
| Shapiro Wilk normality test (p) | 1 | 8.77E-05 | 1 | 0.006 | NA | 1 | 0.002 |

**Supplementary Table S14.** Summary statistics of Estimated Original Mass (EOM) of the cores according knapping method. SD = Standard deviation, CV = Coefficient of Variation. Bif. Cent = Bifacial centripetal. Bif. Ort = Bifacial orthogonal. B. Anvil = Bipolar on anvil. Multi. = Multipolar multifacial. Uni. Bip = Unifacial bipolar. Uni. Cent = Unifacial centripetal. Uni. Long = Unipolar longitudinal.
