# Supplementary material for: Oldowan Technology Amid Shifting Environments ∼2.03–1.83 Million Years Ago
Source: Frontiers journal article supplement (doi:10.3389/fevo.2022.788101), 2022-03-03
Supplement: Table_15.DOCX [file Table_15.DOCX]

|  | Bif. Cent | Bif. Ort | B. Anvil | Multi. | Uni. Bip | Uni. Cent | Uni. Long |
| --- | --- | --- | --- | --- | --- | --- | --- |
| *n* | 2 | 10 | 2 | 18 | 1 | 2 | 13 |
| Min (%) | 64.64 | 45.27 | 39.46 | 60.82 | 46.43 | 48.43 | 23.22 |
| Max (%) | 71.05 | 75.31 | 60.69 | 81.17 | 46.43 | 75.84 | 83.98 |
| Mean (%) | 67.85 | 59.46 | 50.08 | 71.78 | 46.43 | 62.13 | 47.30 |
| Median (%) | 67.85 | 54.94 | 50.08 | 72.58 | 46.43 | 62.13 | 50.00 |
| SD | 4.53 | 9.39 | 15.01 | 6.04 | NA | 19.38 | 18.28 |
| CV | 0.06 | 0.15 | 0.29 | 0.08 | NA | 0.31 | 0.38 |
| Shapiro Wilk normality test (p) | 1 | 0.29 | 1 | 0.16 | NA | 1 | 0.66 |

**Supplementary Table S15.** Summary statistics of Estimated Percentage of Extracted Mass (EPEM) of the cores according knapping strategy. SD = Standard deviation, CV = Coefficient of Variation. Bif. Cent = Bifacial centripetal. Bif. Ort = Bifacial orthogonal. B. Anvil = Bipolar on anvil. Multi. = Multipolar multifacial. Uni. Bip = Unifacial bipolar. Uni. Cent = Unifacial centripetal. Uni. Long = Unipolar longitudinal.
